# Supplementary material for: Evaluating and analyzing the comprehensive community disaster reduction capability
Source: Copernicus journal article supplement (doi:10.5194/nhess-2018-137), 2018-07-16
Supplement: Supplementary file 1 [file The calculation and analysis table of CCDRC.xlsx]

## Sheet: Dongzhu
Statistics of indicators for disaster prevention and mitigation in community (Village) in 2016
Community Name：＿＿＿＿＿Str＿＿＿＿＿Community(Village)		Date：＿＿year＿＿ month＿＿ day
Primary Indices	Secondary Indices	Unit	Ljing 1st	Ljing 2nd	Xxu	Yma	Dshi	Yjiang	Yshi	Zhcun	Xsu	Hqu	Chxiang
Disaster risk evaluation capability	Number of group event disasters	times/year	1	0.001	0.001	0.001	0.001	0.001	0.001	0.001	0.001	0.001	0.001
	Number of fire disasters	times/year	0.001	0.001	0.001	0.001	0.001	0.001	0.001	0.001	0.001	0.001	0.001
	Disaster risk	1-4, from weak to strong	1	1	1	1	1	1	1	1	1	1	1
Rescue and support capability	Compilation of comprehensive asylum map	1or0,whether or not	1	1	1	1	1	0.001	0.001	1	1	1	1
	Disaster reduction capital investment	10000RMB/year	2	1	1	1	1	1	1	1	0.001	1	1
	Number of emergency rescue teams	teams	1	1	1	1	1	1	1	1	1	1	1
	Disaster information personnel	persons	1	18	1	2	1	1	1	2	2	2	2
	Reserve of rescue materials	10000RMB	0.001	0.001	0.5	0.5	0.5	0.8	0.5	0.5	0.001	0.5	0.5
	Per capita medical resources	/10,000 persons	2	0.001	38.91	135	38.91	13.5	0.001	136.4	0.001	116.3	51
Engineering defense capability	Ratio of non-construction area	%	80	83	86	94	95	94	91	91	93	93	92
	Internal road density	km/km2	9.1	7.2	8.4	2.6	1.8	2	3.9	4	1.8	2	2.9
	Standard proportion of buildings without fortification	%	0.01273	0.0119244	0.0565293	0.00119361	0.0119445	0.0299077	0.00720842	0.0159997	0.00682175	0.0030748	0.0274476
	Standard proportion of building fortifications	%	98.727	98.8076	94.3471	99.8806	98.8056	97.0092	99.2792	98.4	99.3178	99.6925	97.2552
	Total length of drainage pipeline	km	2	15	1.5	1.6	1.3	1.8	1.2	1.5	0.001	1	2
	Completion rate of fire protection facilities	0-1	1	1	1	1	1	1	1	1	0.001	1	1
	Area of underground civil defense facilities	square meters	0.001	0.001	0.001	0.001	0.001	0.001	0.001	0.001	0.001	0.001	0.001
Social and economic base support capability	Total population of the community (Village)	10,000 persons	1.12	1.018	0.111	0.8	0.148	0.12	0.12	0.11	0.057	0.129	0.157
	Residents number in the community (Village)	10,000 persons	0.52	0.581	0.103	0.16	0.148	754	0.11	0.11	0.057	0.129	0.157
	Number of floating population in the community (Village)	10,000 persons	0.6	0.232	0.008	0.001	0.001	0.0023	0.004	0.001	0.001	0.001	0.002
	Population from 18-60 years old	10,000 persons	0.35	0.391	0.06	0.049	0.0884	0.074	0.076	0.067	0.04	0.077	0.091
	Ratio of population from 18-60 years old	﹪	67	67	58	31	60	68	69	61	70	60	58
	Income per capita	10000RMB	1.45	1.45	1.25	2	1.25	2.5	2.5	1.2	1.45	3.12	2.05	1.83818
Disaster management capability	Daily management system	1or0,whether or not	1	1	1	1	1	1	1	1	1	1	1
	Periodic inspection system	1or0,whether or not	1	1	1	1	1	1	1	1	1	1	1
	Periodic examination system	1or0,whether or not	0.001	1	1	1	1	1	1	1	1	1	1
	Social mobilization mechanism	1or0,whether or not	0.001	1	1	1	1	1	1	1	1	1	1
	Comprehensive disaster reduction archive	1or0,whether or not	1	1	1	1	1	1	1	1	1	1	1
	Comprehensive disaster reduction demonstration	1or0,whether or not	0.001	0.001	0.001	0.001	0.001	0.001	0.001	0.001	0.001	0.001	0.001
	Quality of demonstration community archive	0,1,2,respectively poor,good and better	1	1	1	1	1	1	1	1	1	1	1
	Proportion of volunteers	%	0.3	0.014	0.01	0.13	0.1	0.75	6	0.2	5	0.2	14
Public cognitive capability	Frequency of disaster reduction publicity activity	times/year	2	1	1	1	1	2	2	1	0.001	1	1
	Number of promotional columns		1	1	1	1	1	2	2	1	0.001	1	1
	Number of promotional materials developed	copies	300	500	300	500	350	550	500	500	0.001	130	1000
	Disaster early-warning display screen	1or0,whether or not	0.001	0.001	0.001	0.001	0.001	0.001	0.001	0.001	0.001	0.001	1
	Publicizing official account of disaster reduction	1or0,whether or not	0.001	0.001	0.001	0.001	0.001	0.001	0.001	0.001	0.001	0.001	0.001
	Frequency of emergency practice	times/year	2	1	2	2	2	2	2	2	0.001	2	2
Remarks

## Sheet: Fengqiao
Statistics of indicators for disaster prevention and mitigation in community (Village) in 2016
Community Name：＿＿＿＿＿Str＿＿＿＿＿Community(Village)		Date：＿＿year＿＿ month＿＿ day
Primary Indices	Secondary Indices	Unit	Dbang	Fjin	Kjia	Mbang	Ma 1st	Ma 2nd	Xjinqiao
Disaster risk evaluation capability	Number of group event disasters	times/year	0.001	0.001	0.001	0.001	0.001	0.001	0.001
	Number of fire disasters	times/year	0.001	1	0.001	1	0.001	0.001	2
	Disaster risk	1-4, from weak to strong	1	1	1	2	1	1	2
Rescue and support capability	Compilation of comprehensive asylum map	1or0,whether or not	0.001	0.001	0.001	0.001	0.001	0.001	0.001
	Disaster reduction capital investment	10000RMB/year	3	3	3	3	3	3	3
	Number of emergency rescue teams	teams	1	1	1	1	1	1	2
	Disaster information personnel	persons	1	1	1	1	1	1	1
	Reserve of rescue materials	10000RMB	1	1	1	1	1	1	1
	Per capita medical resources	/10,000 persons	7.77	0.001	14.88	5	12.63	12.63	12.63
Engineering defense capability	Ratio of non-construction area	%	69	66	71	68	87	87	72
	Internal road density	km/km2	12.2	15.3	7.2	15	4.2	4.2	11.2
	Standard proportion of buildings without fortification	%	0.0493059	0.0338628	0.0195556	0.0270758	0.023	0.023	0.0282683
	Standard proportion of building fortifications	%	95.0694	96.6137	98.0444	97.2924	97.7	97.2	97.1732
	Total length of drainage pipeline	km	4	3	3	4	2.5	3	3.5
	Completion rate of fire protection facilities	0-1	1	1	0.01	1	1	1	1
	Area of underground civil defense facilities	square meters	12907.3	1000	1500	8000	57713.5	2000	15898.9
Social and economic base support capability	Total population of the community (Village)	10,000 persons	2.06	2.15	2.15	3.2	6	3.5	3.6
	Residents number in the community (Village)	10,000 persons	0.61	1.05	0.95	1.5	0.55	0.93	1.1
	Number of floating population in the community (Village)	10,000 persons	1.45	1.1	1.2	1.7	5.45	2.57	2.5
	Population from 18-60 years old	10,000 persons	0.516	0.53	1.6	0.72	0.32	0.4	0.68
	Ratio of population from 18-60 years old	﹪	85	51	80	48	0.58	0.6	0.19
	Income per capita	10000RMB	3	3	3	3	3	3	4
Disaster management capability	Daily management system	1or0,whether or not	1	1	1	1	1	1	1
	Periodic inspection system	1or0,whether or not	1	1	1	1	1	1	1
	Periodic examination system	1or0,whether or not	1	1	1	1	1	1	1
	Social mobilization mechanism	1or0,whether or not	1	1	1	1	1	1	1
	Comprehensive disaster reduction archive	1or0,whether or not	0.001	0.001	0.001	0.001	0.001	0.001	0.001
	Comprehensive disaster reduction demonstration	1or0,whether or not	0.001	1	0.001	0.001	0.001	0.001	0.001
	Quality of demonstration community archive	0,1,2,respectively poor,good and better	0.001	1	1	0.001	0.001	0.001	0.001
	Proportion of volunteers	%	2.43	1	1	1.6	3	1.5	2.8
Public cognitive capability	Frequency of disaster reduction publicity activity	times/year	5	2	4	2	4	4	3
	Number of promotional columns		2	1	1	1	1	1	2个
	Number of promotional materials developed	copies	50	0.001	0.001	0.001	0.001	0.001	1000册
	Disaster early-warning display screen	1or0,whether or not	1	1	1	1	1	1	1
	Publicizing official account of disaster reduction	1or0,whether or not	1	1	1	1	1	1	1
	Frequency of emergency practice	times/year	2	1	1	1	1	1	2
Remarks

## Sheet: Hengtang
Statistics of indicators for disaster prevention and mitigation in community (Village) in 2016
Community Name：＿＿＿＿＿Str＿＿＿＿＿Community(Village)		Date：＿＿year＿＿ month＿＿ day
Primary Indices	Secondary Indices	Unit	Shihu	Xfu
Disaster risk evaluation capability	Number of group event disasters	times/year	0.001	0.001
	Number of fire disasters	times/year	0.001	1
	Disaster risk	1-4, from weak to strong	1	1
Rescue and support capability	Compilation of comprehensive asylum map	1or0,whether or not	0.001	0.001
	Disaster reduction capital investment	10000RMB/year	0.001	0.001
	Number of emergency rescue teams	teams	0.001	1
	Disaster information personnel	persons	0.001	0.001
	Reserve of rescue materials	10000RMB	0.001	0.001
	Per capita medical resources	/10,000 persons	0.001
Engineering defense capability	Ratio of non-construction area	%	80	89.5
	Internal road density	km/km2	8.8	7.2
	Standard proportion of buildings without fortification	%	0.0286833	0.059
	Standard proportion of building fortifications	%	97.1317	94.1
	Total length of drainage pipeline	km	0.001	0.001
	Completion rate of fire protection facilities	0-1	0.001	0.8
	Area of underground civil defense facilities	square meters		7800
Social and economic base support capability	Total population of the community (Village)	10,000 persons	0.02	1.5
	Residents number in the community (Village)	10,000 persons	0.2187	0.6
	Number of floating population in the community (Village)	10,000 persons	0.005	0.9
	Population from 18-60 years old	10,000 persons	0.01	0.36
	Ratio of population from 18-60 years old	﹪	12	60
	Income per capita	10000RMB	1.5	1.5
Disaster management capability	Daily management system	1or0,whether or not	0.001	1
	Periodic inspection system	1or0,whether or not	0.001	1
	Periodic examination system	1or0,whether or not	0.001	1
	Social mobilization mechanism	1or0,whether or not	0.001	1
	Comprehensive disaster reduction archive	1or0,whether or not	0.001	1
	Comprehensive disaster reduction demonstration	1or0,whether or not	0.001	0.001
	Quality of demonstration community archive	0,1,2,respectively poor,good and better	2	1
	Proportion of volunteers	%	0.001	3.3
Public cognitive capability	Frequency of disaster reduction publicity activity	times/year	0.001	1
	Number of promotional columns		1	0.001
	Number of promotional materials developed	copies		0.001
	Disaster early-warning display screen	1or0,whether or not	0.001	0.001
	Publicizing official account of disaster reduction	1or0,whether or not	0.001	0.001
	Frequency of emergency practice	times/year	0.001	1
Remarks

## Sheet: Xushuguan
Statistics of indicators for disaster prevention and mitigation in community (Village) in 2016
Community Name：＿＿＿＿＿Str＿＿＿＿＿Community(Village)		Date：＿＿year＿＿ month＿＿ day
Primary Indices	Secondary Indices	Unit	Yxin	Ylian	Wgong	Xshan	Qdeng	Lhua	Jtu	Jting	Hfeng	Hxiang	Bwei
Disaster risk evaluation capability	Number of group event disasters	times/year	0.001	0.001	0.001	1	3	0.001	0.001	0	0.001	0.001	0.001
	Number of fire disasters	times/year	0.001	0.001	0.001	0.001	0.001	1	0.001	2	0.001	1	0.001
	Disaster risk	1-4, from weak to strong	3	1	1	3	3	1	2	1	2	2	1
Rescue and support capability	Compilation of comprehensive asylum map	1or0,whether or not	有	1	0.001	1	1	1	1	1	0.001	1	0.001
	Disaster reduction capital investment	10000RMB/year	20	20	0.001	2	2	0.001	2	0.001	0.001	20	0.2
	Number of emergency rescue teams	teams	7	7	1	2	1	2	1	1	1	4	1
	Disaster information personnel	persons	1	68	1	1	5	1	3	1	1	1	1
	Reserve of rescue materials	10000RMB	1	2	0.5	5	1	0.3	1	5	0.001	2	1
	Per capita medical resources	/10,000 persons	17.98	15.28	22.22	17.54	34.55	4.1	38.58	17.54	7.58	17.54	17.54	19.4856
Engineering defense capability	Ratio of non-construction area	%	92	83	95	83	89	63	94	94	75	68	83
	Internal road density	km/km2	5	4.9	1.3	4.7	3.8	4.7	2.4	1.9	10.6	4.9	7.9
	Standard proportion of buildings without fortification	%	0.0243401	0.0245646	0.00472939	0.026703	0.0157141	0.018478	0.00419354	0.025	0.0383039	0.0254704	0.0324092
	Standard proportion of building fortifications	%	97.566	97.5435	99.5271	97.3297	98.4286	98.1522	99.5806	97.5	96.1696	97.453	96.7591
	Total length of drainage pipeline	km	13.6	0.001	10	7	3	0.3	6	167	18	1	10
	Completion rate of fire protection facilities	0-1	18个、100%	1	0.001	1	1	1	1	0.99	1	1	1
	Area of underground civil defense facilities	square meters	无	无	无	无	无	1.5万	无	53565	7741	无	无
Social and economic base support capability	Total population of the community (Village)	10,000 persons	10011	0.9819	0.45万人	2000	0.2894万人	0.488	0.2592万人	1.1	1.32	0.37	0.085
	Residents number in the community (Village)	10,000 persons	5745	0.5869	0.25万人	1800	0.2794万人	0.191	0.2212万人	0.24	0.86	0.29	0.075
	Number of floating population in the community (Village)	10,000 persons	378	0.395	0.2万人	200	0.11万人	0.06	0.038万人	0.19	0.46	0.08	0.01
	Population from 18-60 years old	10,000 persons	3598	0.88	0.15万人	1580	0.1716万人	0.172	0.1339万人	0.73	0.47	0.185	0.052
	Ratio of population from 18-60 years old	﹪	0.63	90	60	0.79	61	90	61	0.67	55	50	0.61
	Income per capita	10000RMB	0.47	1.6	2.1	1	2.2	1.6	2.2	4.1	1.6	1.6	0.5
Disaster management capability	Daily management system	1or0,whether or not	1	1	1	1	1	0.001	1	1	0.001	1	1
	Periodic inspection system	1or0,whether or not	1	1	1	1	1	1	1	1	0.001	1	1
	Periodic examination system	1or0,whether or not	1	1	1	1	1	1	1	1	0.001	1	1
	Social mobilization mechanism	1or0,whether or not	1	1	1	1	1	1	1	1	0.001	1	1
	Comprehensive disaster reduction archive	1or0,whether or not	1	1	1	1	1	1	1	1	0.001	1	1
	Comprehensive disaster reduction demonstration	1or0,whether or not	0.001	1	0.001	0.001	0.001	0.001	0.001	0.001	0.001	1	0.001
	Quality of demonstration community archive	0,1,2,respectively poor,good and better	1	2	0.001	0.001	0.001	1	1	0	0.001	2	0.001
	Proportion of volunteers	%	1.7	1.5	1	7.9	1.3	1	2	2	0.85	1.35	0.35
Public cognitive capability	Frequency of disaster reduction publicity activity	times/year	5	8	2	80	2	2	2	1	1	4	500
	Number of promotional columns		16	11	1	2	1	1	1	1	0.001	8	1
	Number of promotional materials developed	copies	1000	600	700	300	700	200	500	50	0.001	2000	500
	Disaster early-warning display screen	1or0,whether or not	1	1	0.001	0.001	0.001	1	0.001	0	1	0.001	0.001
	Publicizing official account of disaster reduction	1or0,whether or not	1	0.001	0.001	0.001	0.001	0.001	0.001	0	0.001	0.001	0.001
	Frequency of emergency practice	times/year	2场次/年	2	2	0.001	1	2	1	1	1	4	1
Remarks

## Sheet: Shishan
Statistics of indicators for disaster prevention and mitigation in community (Village) in 2016
Community Name：＿＿＿＿＿Str＿＿＿＿＿Community(Village)		Date：＿＿year＿＿ month＿＿ day
Primary Indices	Secondary Indices	Unit	Hshan	Jse	Shshan	Wfen	Xsheng	Xtai	Hshan	Xshi
Disaster risk evaluation capability	Number of group event disasters	times/year	0.001	0.001	0.001	0.001	0.001	0.001	0.001	1
	Number of fire disasters	times/year	0.001	0.001	5	0.001	0.001	6	2	0.001
	Disaster risk	1-4, from weak to strong	2	1	2	1	2	1	3	1
Rescue and support capability	Compilation of comprehensive asylum map	1or0,whether or not	1	1	1	1	1	1	1	1
	Disaster reduction capital investment	10000RMB/year	1.5	2	15	5	3	26.195	0.2	1
	Number of emergency rescue teams	teams	7	5	8	7	4	4	1	6
	Disaster information personnel	persons	1	1	1	1	1	5	1	1
	Reserve of rescue materials	10000RMB	1	1.5	3	2.3	1	2	1.5	3
	Per capita medical resources	/10,000 persons	0.42	0.001	0.001	171.31	171.31	10	0.87	2.35
Engineering defense capability	Ratio of non-construction area	%	72	74	69	75	86	74	72	75
	Internal road density	km/km2	5.7	7.3	9.2	6.5	7.3	9.1	11.2	6.9
	Standard proportion of buildings without fortification	%	0.0297112	0.0466971	0.036378	0.0260115	0.0353615	0.0297429	0.0479886	0.0333119
	Standard proportion of building fortifications	%	97.0289	95.3303	96.3622	97.3988	96.4639	97.0257	95.2011	96.6688
	Total length of drainage pipeline	km
	Completion rate of fire protection facilities	0-1	0.001	0.001	1	0.97	1	0.001	0.88	0.001
	Area of underground civil defense facilities	square meters				18804.1	65000		15991
Social and economic base support capability	Total population of the community (Village)	10,000 persons	2.3696	2.2	3.4257	2.3	2.37	2.4	2.3	2.5545
	Residents number in the community (Village)	10,000 persons	0.58	0.7	1.717	0.9745	1.3487	1.19	1.16	0.4545
	Number of floating population in the community (Village)	10,000 persons	1.7896	1.5	1.7087	1.3543	0.6513	1.2	1.16	2.1
	Population from 18-60 years old	10,000 persons	0.2713	3500	1.4881	0.56	0.8496	0.96	0.62	1.62
	Ratio of population from 18-60 years old	﹪	47	52	87	57	63	65	53	63
	Income per capita	10000RMB	5	5	5	5.6	5	5	5	5
Disaster management capability	Daily management system	1or0,whether or not	1	1	1	1	1	1	1	1
	Periodic inspection system	1or0,whether or not	1	1	1	1	1	1	1	1
	Periodic examination system	1or0,whether or not	1	1	1	1	1	1	1	1
	Social mobilization mechanism	1or0,whether or not	1	1	1	1	1	1	1	1
	Comprehensive disaster reduction archive	1or0,whether or not	1	1	1	1	1	1	1	1
	Comprehensive disaster reduction demonstration	1or0,whether or not	0.001	0.001	1	1	1	1	0.001	0.001
	Quality of demonstration community archive	0,1,2,respectively poor,good and better	1	2	2	2	2	2	0.001	2
	Proportion of volunteers	%	2.7	6.48	1.34	2.6	2.8	3	3	1.1
Public cognitive capability	Frequency of disaster reduction publicity activity	times/year	5	4	2	4	2	2	2	12
	Number of promotional columns		14	1	5	12	1	12	4	2
	Number of promotional materials developed	copies	10000	500	600	15000	1000	1000	500	620
	Disaster early-warning display screen	1or0,whether or not	0.001	1	1	1	1	1	1	1
	Publicizing official account of disaster reduction	1or0,whether or not	1	0.001	0.001	1	1	0.001	0.001	0.001
	Frequency of emergency practice	times/year	2	2	2	4	1	2	1	2
Remarks

## Sheet: Tongan
Statistics of indicators for disaster prevention and mitigation in community (Village) in 2016
Community Name：＿＿＿＿＿Str＿＿＿＿＿Community(Village)		Date：＿＿year＿＿ month＿＿ day
Primary Indices	Secondary Indices	Unit	Byao	Djing	Hchuan	Htong 1st	Htong 2nd	Htong 3rd	Htong 4th	Htong 6th	Jxi	Jshi	Qfeng	Shshan	Txin	Xjie
Disaster risk evaluation capability	Number of group event disasters	times/year	0.001	0.001	0.001	0.001	0.001	0.001	0.001	0.001	0.001	0.001	0.001	0.001	0.001	0.001
	Number of fire disasters	times/year	0.001	0.001	0.001	0.001	0.001	0.001	0.001	0.001	0.001	0.001	0.001	0.001	0.001	0.001
	Disaster risk	1-4, from weak to strong	2	2	2	2	2	2	3	3	2	2	2	3	2	2
Rescue and support capability	Compilation of comprehensive asylum map	1or0,whether or not	0.001	0.001	0.001	0.001	0.001	0.001	0.001	0.001	0.001	0.001	0.001	0.001	0.001	0.001
	Disaster reduction capital investment	10000RMB/year	0.001	0.001	0.001	0.001	0.001	0.001	0.001	0.001	0.001	0.001	0.001	30	0.001	0.001
	Number of emergency rescue teams	teams	1	1	1	1	1	1	6	4	1	1	1	1	1	1
	Disaster information personnel	persons	1	1	1	1	1	1	1	1	1	1	1	1	1	1
	Reserve of rescue materials	10000RMB	1	1	1	0.001	0.001	0.001	2	2	1	1	1	20	1	0.001
	Per capita medical resources	/10,000 persons	0.001	0.001	5.25	163.64	91.81	5.88	67.42	130.43	0.001	0.001	0.001	0.001	0.001	0.001
Engineering defense capability	Ratio of non-construction area	%	94	94	92	78	73	85	87	83	93	94	93	95	84	88
	Internal road density	km/km2	3.8	2.3	4.4	7.1	12	8.5	6.3	11.46	3.3	7.3	4.9	3.3	6.6	2.45
	Standard proportion of buildings without fortification	%	0.0256897	0.0222183	0.0203226	0.0640123	0.0177069	0.000844206	0.0358417	0.061	0.0112689	0.0218557	0.0149409	0.0270278	0.0134604	0.168
	Standard proportion of building fortifications	%	97.431	97.7782	97.9677	93.5988	98.2293	99.9156	96.4158	93.9	98.8731	97.8144	98.5059	97.2972	98.654	83.2
	Total length of drainage pipeline	km												7000		2000
	Completion rate of fire protection facilities	0-1	0.001	0.001	0.001	0.001	0.001	0.001	0.001	0.001	0.001	0.001	0.001	1	0.001	0.8
	Area of underground civil defense facilities	square meters	无	0.001	0.001	0.001	0.001	0.001	0.001	0.001	0.001	0.001	0.001	0.001	0.001	0.001
Social and economic base support capability	Total population of the community (Village)	10,000 persons	0.16	0.193	0.1906	1.1万人	0.6535	1.02	0.89	0.46	0.25	0.2	0.0075	0.1694	0.08	0.4385
	Residents number in the community (Village)	10,000 persons	0.15	0.19	0.214	0.622万人	0.6898	0.68	0.53	0.35	0.25	0.19	0.0044	0.1943	0.08	0.2363
	Number of floating population in the community (Village)	10,000 persons	0.01	0.003	0.0016	0.398万人	0.32	0.34	0.35	0.11	0	0.003	0.0031	0.026	10	0.202
	Population from 18-60 years old	10,000 persons	0.0975	1063	0.102	0.3597万人	0.3922	0.45	0.33	0.22	0.14	0.1	0.0025	0.1264	0.0452	0.1425
	Ratio of population from 18-60 years old	﹪	65	56	53	33	57	45	37	48	57	50	71	74	57	33
	Income per capita	10000RMB	1.8	1.5	1.8	1.5	1.5	1.5	1.5		1.5	2.6	1.36	3.9	2	2.5万元
Disaster management capability	Daily management system	1or0,whether or not	1	1	1	1	1	1	1	1	1	1	1	1	1	1
	Periodic inspection system	1or0,whether or not	1	1	1	1	1	1	1	1	1	1	1	1	1	1
	Periodic examination system	1or0,whether or not	1	1	1	1	1	1	1	1	1	1	1	1	1	1
	Social mobilization mechanism	1or0,whether or not	1	1	1	1	1	1	1	1	1	1	1	1	1	1
	Comprehensive disaster reduction archive	1or0,whether or not	1	1	1	1	1	1	1	1	1	1	1	1	1	1
	Comprehensive disaster reduction demonstration	1or0,whether or not	0.001	0.001	0.001	0.001	0.001	0.001	0.001	0.001	0.001	0.001	0.001	0.001	0.001	0.001
	Quality of demonstration community archive	0,1,2,respectively poor,good and better	1	1	1	1	1	1	1	1	1	1	1	1	1	1
	Proportion of volunteers	%	0.00625	0.00518	0.00525	0.38	0.612	0.3	0.449	0.87	0.4	0.5	6.67	0.47	1.25	3
Public cognitive capability	Frequency of disaster reduction publicity activity	times/year	1	1	1	1	1	3	2	2	1	1	1	1	1	2
	Number of promotional columns		1	1	1	3个	2个	3个	3	2	1	1	1	2	1	2个
	Number of promotional materials developed	copies	100	100	100	1000	200	500	500	500	100	100	100	800	100	200
	Disaster early-warning display screen	1or0,whether or not	1	0.001	0.001	1	1	1	1	1	1	1	0.001	1	0.001	0.001
	Publicizing official account of disaster reduction	1or0,whether or not	0.001	0.001	0.001	1	1	1	1	1	0.001	0.001	0.001	0.001	0.001	1
	Frequency of emergency practice	times/year	0.001	0.001	0.001	1	1	1	1	1	0.001	0.001	0.001	0.001	0.001	1
Remarks

## Sheet: Yangshan
Statistics of indicators for disaster prevention and mitigation in community (Village) in 2016
Community Name：＿＿＿＿＿Str＿＿＿＿＿Community(Village)		Date：＿＿year＿＿ month＿＿ day
Primary Indices	Secondary Indices	Unit	Lxiang	Njin	Yshan 1st	Yshan 2nd	Yshan 3rd	Yshan 4th	Wchang	Xlu	Chjiang
Disaster risk evaluation capability	Number of group event disasters	times/year	0.001	1	0.001	1	0.001	0.001	0.001	0.001	0.001
	Number of fire disasters	times/year	0.001	0.001	1	2	0.001	1	1	0	2
	Disaster risk	1-4, from weak to strong	1	2	1	2	1	2	3	1	2
Rescue and support capability	Compilation of comprehensive asylum map	1or0,whether or not	1	0.001	1	0.001	1	0.001	1	0.001	0.001
	Disaster reduction capital investment	10000RMB/year	0.001	0.2	0.001	0.001	3	0.001	0.001	0.001	0.001
	Number of emergency rescue teams	teams	1	1	1		1	1	13	1	0.001
	Disaster information personnel	persons	1	1	1	1	1	1	1	1	0.001
	Reserve of rescue materials	10000RMB	0.001	0.001	2	0.001	1	0.001	0.001	2	0.001
	Per capita medical resources	/10,000 persons	0.001	0.001	0.63	0.001	0.001	0.001	0.001	1.75	0.001
Engineering defense capability	Ratio of non-construction area	%	90	66	76	82	75	70	90	94	87.7
	Internal road density	km/km2	4.2	1.9	12.3	7.7	10.3	14.5	4	2.8	5.8
	Standard proportion of buildings without fortification	%	0.0386471	0.0513607	0.0526489	0.0290703	0.0024908	0.0336941	0.0378	0.023	0.23
	Standard proportion of building fortifications	%	96.1353	94.8639	94.7351	97.093	99.7509	96.6306	96.2	97.7	77
	Total length of drainage pipeline	km					1.3	0.2
	Completion rate of fire protection facilities	0-1	0.001	0.001	1	1	1	1	0.96	1	0.001
	Area of underground civil defense facilities	square meters	20000	0.001	0.001	0.001	无	无	0.001	0.001	0.001
Social and economic base support capability	Total population of the community (Village)	10,000 persons	2	0.24	1.58	1.08	10497	5037	4.11	0.57	16480
	Residents number in the community (Village)	10,000 persons	0.5	0.19	0.75	0.73	5783	5037	0.52	0.27	1480
	Number of floating population in the community (Village)	10,000 persons	1.5	0.0548	0.83	0.6	4593	4010	0.77	0.3	15000
	Population from 18-60 years old	10,000 persons	1.4	0.1	0.59	0.8	9532	3012	0.35	0.13
	Ratio of population from 18-60 years old	﹪	70	57	79	60	85	60	67	48	62
	Income per capita	10000RMB	1	1	1	1	3	0.25	2	2	2
Disaster management capability	Daily management system	1or0,whether or not	1	1	1	1	1	0.001	1	1	1
	Periodic inspection system	1or0,whether or not	1	1	1	1	1	1	1	1	1
	Periodic examination system	1or0,whether or not	1	1	1	1	1	0.001	1	1	1
	Social mobilization mechanism	1or0,whether or not	1	0.001	1	1	1	0.001	1	1	1
	Comprehensive disaster reduction archive	1or0,whether or not	0.001	1	1	1	1	1	1	1	1
	Comprehensive disaster reduction demonstration	1or0,whether or not	0.001	0.001	0.001	0.001	0.001	0.001	0.001	0.001	0.001
	Quality of demonstration community archive	0,1,2,respectively poor,good and better	0.001	0.001	1	1	1	2	0.001	0.001	0.001
	Proportion of volunteers	%	0.001	0.02	0.13	20	5	0.1	0.5	0.3	0.02
Public cognitive capability	Frequency of disaster reduction publicity activity	times/year	1	1	1	2	3	1	1	1	1
	Number of promotional columns		6	0.001	0.001	1	1	6		0.001	1
	Number of promotional materials developed	copies	500	20	400	50	4235	100	300	400	0.001
	Disaster early-warning display screen	1or0,whether or not	1	0.001	1	1	0	1	1	1	1
	Publicizing official account of disaster reduction	1or0,whether or not	0.001	0.001	0.001	0.001	0.001	0.001	0.001	0.001	0.001
	Frequency of emergency practice	times/year	0.001	0.001	0.001	1	1	0.001	0.001	0.001	0.001
Remarks

## Sheet: Zhenhu
Statistics of indicators for disaster prevention and mitigation in community (Village) in 2016
Community Name：＿＿＿＿＿Str＿＿＿＿＿Community(Village)		Date：＿＿year＿＿ month＿＿ day
Primary Indices	Secondary Indices	Unit	Xjing	Mshan	Swang	Shshan	Shfan	Shqian	Thu	Xicun	Xincun	Xan
Disaster risk evaluation capability	Number of group event disasters	times/year	0.001	0.001	0.001	0.001	0.001	0.001	0.001	0.001	0.001	1
	Number of fire disasters	times/year	0.001	0.001	0.001	0.001	1	0.001	0.001	0.001	0.001	0.001
	Disaster risk	1-4, from weak to strong	1	1	1	4	2	1	1	1	1	3
Rescue and support capability	Compilation of comprehensive asylum map	1or0,whether or not	0.001	0.001	0.001	0.001	0.001	0.001	0.001	0.001	0.001	0.001
	Disaster reduction capital investment	10000RMB/year	1	0.6	0	0.8	0	0.8	2	0.5	0.5	10
	Number of emergency rescue teams	teams	1	1	1	1	1	1	1	1	1	1
	Disaster information personnel	persons	有	3	1	3	2	6	1	3	3	4
	Reserve of rescue materials	10000RMB	5	2.5	2	2	0	2.5	5	2	2	3
	Per capita medical resources	/10,000 persons	0.001	0.001	0.001	0.001	8.12	0.001	0.001	0.001	0.001	14.63
Engineering defense capability	Ratio of non-construction area	%	87	95	91	89	91	93	90.9	93	90	92
	Internal road density	km/km2	8	2.7	4	7.2	3.6	2.6	5.9	2.5	5.1	4.6
	Standard proportion of buildings without fortification	%	0.00517103	0.00705334	0.0167334	0.00394197	0.00891557	0.0341313	0.0056	0.00708861	0.00313757	0.00688047
	Standard proportion of building fortifications	%	99.4829	99.2947	98.3267	99.6058	99.1084	96.5869	99.44	99.2911	99.6862	99.312
	Total length of drainage pipeline	km	0.001	0.35	0.001	0.35	0.001	0.8	0.001	0.3	0.35	0.5
	Completion rate of fire protection facilities	0-1	0.001	0.001	0.001	0.001	0.001	0.001	0.001	0.001	0.001	0.001
	Area of underground civil defense facilities	square meters	0.001	0.001	0.001	0.001	0.001	0.001	0.001	0.001	0.001	0.001
Social and economic base support capability	Total population of the community (Village)	10,000 persons	0.19	0.2056	0.24	0.2239	0.2463	0.3103	0.21	0.1823	0.1455	0.2735
	Residents number in the community (Village)	10,000 persons	0.19	0.2013	0.23	0.2228	0.2403	0.3003	0.2	0.1792	0.1445	0.2668
	Number of floating population in the community (Village)	10,000 persons	0.001	0.0043	0.01	0.0011	0.006	0.0042	0.001	0.0031	0.001	0.067
	Population from 18-60 years old	10,000 persons	0.15	0.1125	0.1	0.1232	1394	0.11	0.17	0.1002	0.0807	0.1596
	Ratio of population from 18-60 years old	﹪	79	55	43	55	58	0.55	0.78	0.55	56	0.6
	Income per capita	10000RMB	1.95	2.32	3.5	2.6	2.3	3	1.95	2.3	2.8	2.2
Disaster management capability	Daily management system	1or0,whether or not	1	1	1	1	1	1	1	1	1	1
	Periodic inspection system	1or0,whether or not	1	1	1	1	1	1	1	1	1	1
	Periodic examination system	1or0,whether or not	1	1	1	1	1	1	1	1	1	1
	Social mobilization mechanism	1or0,whether or not	1	1	1	1	1	1	1	1	1	1
	Comprehensive disaster reduction archive	1or0,whether or not	1	1	1	1	1	1	1	1	1	1
	Comprehensive disaster reduction demonstration	1or0,whether or not	0.001	0.001	0.001	0.001	0.001	0.001	0.001	0.001	0.001	0.001
	Quality of demonstration community archive	0,1,2,respectively poor,good and better	1	0.001	0.001	0.001	0.001	0.001	2	0.001	0.001	0.001
	Proportion of volunteers	%	5.26	2.2	3	0.72	0.83	0.83	4.76	0.83	2.89	0.013
Public cognitive capability	Frequency of disaster reduction publicity activity	times/year	4	4	0.001	1	1	1	4	1	1	1
	Number of promotional columns		2	1	0.001	1	1	1	1	1	1	1
	Number of promotional materials developed	copies	500	380	50	400	400	600	500	400	400	680
	Disaster early-warning display screen	1or0,whether or not	0.001	0.001	0.001	0.001	0.001	0.001	0.001	0.001	0.001	0.001
	Publicizing official account of disaster reduction	1or0,whether or not	1	0.001	0.001	0.001	0.001	0.001	0.001	0.001	0.001	0.001
	Frequency of emergency practice	times/year	4	1	0.001	1	1	1	2	1	1	1
Remarks

## Sheet: Index set
			Dongzhu Twn											Fengqiao Str							Hengtang Str		Xushuguan Twn											Shishan Str								Tongan Twn
Primary Indices	Secondary Indices	Unit	Ljing 1st	Ljing 2nd	Xxu	Yma	Dshi	Yjiang	Yshi	Zhcun	Xsu	Hqu	Chxiang	Dbang	Fjin	Kjia	Mbang	Ma 1st	Ma 2nd	Xjinqiao	Shihu	Xfu	Yxin	Ylian	Wgong	Xshan	Qdeng	Lhua	Jtu	Jting	Hfeng	Hxiang	Bwei	Hshan	Jse	Shshan	Wfen	Xsheng	Xtai	Hshan	Xshi	Byao	Djing	Hchuan	Htong 1st	Htong 2nd	Htong 3rd	Htong 4th	Htong 6th
Disaster risk evaluation capability	Number of group event disasters	times/year	1	0.001	0.001	0.001	0.001	0.001	0.001	0.001	0.001	0.001	0.001	0.001	0.001	0.001	0.001	0.001	0.001	0.001	0.001	0.001	0.001	0.001	0.001	1	3	0.001	0.001	0.001	0.001	0.001	0.001	0.001	0.001	0.001	0.001	0.001	0.001	0.001	1	0.001	0.001	0.001	0.001	0.001	0.001	0.001	0.001
	Number of fire disasters	times/year	0.001	0.001	0.001	0.001	0.001	0.001	0.001	0.001	0.001	0.001	0.001	0.001	1	0.001	1	0.001	0.001	2	0.001	1	0.001	0.001	0.001	0.001	0.001	1	0.001	2	0.001	1	0.001	0.001	0.001	5	0.001	0.001	6	2	0.001	0.001	0.001	0.001	0.001	0.001	0.001	0.001	0.001
	Disaster risk	1-4, from weak to strong	1	1	1	1	1	1	1	1	1	1	1	1	1	1	2	1	1	2	1	1	3	1	1	3	3	1	2	1	2	2	1	2	1	2	1	2	1	3	1	2	2	2	2	2	2	3	3
Rescue and support capability	Compilation of comprehensive asylum map	1or0,whether or not	1	1	1	1	1	0.001	0.001	1	1	1	1	0.001	0.001	0.001	0.001	0.001	0.001	0.001	0.001	0.001	1	1	0.001	1	1	1	1	1	0.001	1	0.001	1	1	1	1	1	1	1	1	0.001	0.001	0.001	0.001	0.001	0.001	0.001	0.001
	Disaster reduction capital investment	10000RMB/year	2	1	1	1	1	1	1	1	0.001	1	1	3	3	3	3	3	3	3	0.001	0.001	20	20	0.001	2	2	0.001	2	0.001	0.001	20	0.2	1.5	2	15	5	3	26.195	0.2	1	0.001	0.001	0.001	0.001	0.001	0.001	0.001	0.001
	Number of emergency rescue teams	teams	1	1	1	1	1	1	1	1	1	1	1	1	1	1	1	1	1	2	0.001	1	7	7	1	2	1	2	1	1	1	4	1	7	5	8	7	4	4	1	6	1	1	1	1	1	1	6	4
	Disaster information personnel	persons	1	18	1	2	1	1	1	2	2	2	2	1	1	1	1	1	1	1	0.001	0.001	1	68	1	1	5	1	3	1	1	1	1	1	1	1	1	1	5	1	1	1	1	1	1	1	1	1	1
	Reserve of rescue materials	10000RMB	0.001	0.001	0.5	0.5	0.5	0.8	0.5	0.5	0.001	0.5	0.5	1	1	1	1	1	1	1	0.001	0.001	1	2	0.5	5	1	0.3	1	5	0.001	2	1	1	1.5	3	2.3	1	2	1.5	3	1	1	1	0.001	0.001	0.001	2	2
	Per capita medical resources	/10,000 persons	2	0.001	38.91	135	38.91	13.5	0.001	136.4	0.001	116.3	51	7.77	0.001	14.88	5	12.63	12.63	12.63	0.001		17.98	15.28	22.22	17.54	34.55	4.1	38.58	17.54	7.58	17.54	17.54	0.42	0.001	0.001	171.31	171.31	10	0.87	2.35	0.001	0.001	5.25	163.64	91.81	5.88	67.42	130.43
Engineering defense capability	Ratio of non-construction area	%	80	83	86	94	95	94	91	91	93	93	92	69	66	71	68	87	87	72	80	89.5	92	83	95	83	89	63	94	94	75	68	83	72	74	69	75	86	74	72	75	94	94	92	78	73	85	87	83
	Internal road density	km/km2	9.1	7.2	8.4	2.6	1.8	2	3.9	4	1.8	2	2.9	12.2	15.3	7.2	15	4.2	4.2	11.2	8.8	7.2	5	4.9	1.3	4.7	3.8	4.7	2.4	1.9	10.6	4.9	7.9	5.7	7.3	9.2	6.5	7.3	9.1	11.2	6.9	3.8	2.3	4.4	7.1	12	8.5	6.3	11.46
	Standard proportion of building fortifications	%	98.727	98.8076	94.3471	99.8806	98.8056	97.0092	99.2792	98.4	99.3178	99.6925	97.2552	95.0694	96.6137	98.0444	97.2924	97.7	97.2	97.1732	97.1317	94.1	97.566	97.5435	99.5271	97.3297	98.4286	98.1522	99.5806	97.5	96.1696	97.453	96.7591	97.0289	95.3303	96.3622	97.3988	96.4639	97.0257	95.2011	96.6688	97.431	97.7782	97.9677	93.5988	98.2293	99.9156	96.4158	93.9
	Completion rate of fire protection facilities	0-1	1	1	1	1	1	1	1	1	0.001	1	1	1	1	0.01	1	1	1	1	0.001	0.8	1	1	0.001	1	1	1	1	0.99	1	1	1	0.001	0.001	1	0.97	1	0.001	0.88	0.001	0.001	0.001	0.001	0.001	0.001	0.001	0.001	0.001
	Area of underground civil defense facilities	square meters	0.001	0.001	0.001	0.001	0.001	0.001	0.001	0.001	0.001	0.001	0.001	12907.3	1000	1500	8000	57713.5	2000	15898.9		7800	0.001	0.001	0.001	0.001	0.001	15000	0.001	53565	7741	0.001	0.001	0.001	0.001	0.001	18804.1	65000	0.001	15991	0.001	0.001	0.001	0.001	0.001	0.001	0.001	0.001	0.001
Social and	Ratio of population from 18-60 years old	﹪	67	67	58	31	60	68	69	61	70	60	58	85	51	80	48	0.58	0.6	0.19	12	60	0.63	90	60	0.79	61	90	61	0.67	55	50	0.61	47	52	87	57	63	65	53	63	65	56	53	33	57	45	37	48
economic base	Income per capita	10000RMB	1.45	1.45	1.25	2	1.25	2.5	2.5	1.2	1.45	3.12	2.05	3	3	3	3	3	3	4	1.5	1.5	0.47	1.6	2.1	1	2.2	1.6	2.2	4.1	1.6	1.6	0.5	5	5	5	5.6	5	5	5	5	1.8	1.5	1.8	1.5	1.5	1.5	1.5
Disaster management capability	Daily management system	1or0,whether or not	1	1	1	1	1	1	1	1	1	1	1	1	1	1	1	1	1	1	0.001	1	1	1	1	1	1	0.001	1	1	0.001	1	1	1	1	1	1	1	1	1	1	1	1	1	1	1	1	1	1
	Periodic inspection system	1or0,whether or not	1	1	1	1	1	1	1	1	1	1	1	1	1	1	1	1	1	1	0.001	1	1	1	1	1	1	1	1	1	0.001	1	1	1	1	1	1	1	1	1	1	1	1	1	1	1	1	1	1
	Periodic examination system	1or0,whether or not	0.001	1	1	1	1	1	1	1	1	1	1	1	1	1	1	1	1	1	0.001	1	1	1	1	1	1	1	1	1	0.001	1	1	1	1	1	1	1	1	1	1	1	1	1	1	1	1	1	1
	Social mobilization mechanism	1or0,whether or not	0.001	1	1	1	1	1	1	1	1	1	1	1	1	1	1	1	1	1	0.001	1	1	1	1	1	1	1	1	1	0.001	1	1	1	1	1	1	1	1	1	1	1	1	1	1	1	1	1	1
	Comprehensive disaster reduction archive	1or0,whether or not	1	1	1	1	1	1	1	1	1	1	1	0.001	0.001	0.001	0.001	0.001	0.001	0.001	0.001	1	1	1	1	1	1	1	1	1	0.001	1	1	1	1	1	1	1	1	1	1	1	1	1	1	1	1	1	1
	Comprehensive disaster reduction demonstration	1or0,whether or not	0.001	0.001	0.001	0.001	0.001	0.001	0.001	0.001	0.001	0.001	0.001	0.001	1	0.001	0.001	0.001	0.001	0.001	0.001	0.001	0.001	1	0.001	0.001	0.001	0.001	0.001	0.001	0.001	1	0.001	0.001	0.001	1	1	1	1	0.001	0.001	0.001	0.001	0.001	0.001	0.001	0.001	0.001	0.001
	Quality of demonstration community archive	0,1,2,respectively poor,good and better	1	1	1	1	1	1	1	1	1	1	1	0.001	1	1	0.001	0.001	0.001	0.001	2	1	1	2	0.001	0.001	0.001	1	1	0	0.001	2	0.001	1	2	2	2	2	2	0.001	2	1	1	1	1	1	1	1	1
	Proportion of volunteers	%	0.3	0.014	0.01	0.13	0.1	0.75	6	0.2	5	0.2	14	2.43	1	1	1.6	3	1.5	2.8	0.001	3.3	1.7	1.5	1	7.9	1.3	1	2	2	0.85	1.35	0.35	2.7	6.48	1.34	2.6	2.8	3	3	1.1	0.00625	0.00518	0.00525	0.38	0.612	0.3	0.449	0.87
Public cognitive capability	Frequency of disaster reduction publicity activity	times/year	2	1	1	1	1	2	2	1	0.001	1	1	5	2	4	2	4	4	3	0.001	1	5	8	2	80	2	2	2	1	1	4	500	5	4	2	4	2	2	2	12	1	1	1	1	1	3	2	2
	Number of promotional columns		1	1	1	1	1	2	2	1	0.001	1	1	2	1	1	1	1	1	2	1	0.001	16	11	1	2	1	1	1	1	0.001	8	1	14	1	5	12	1	12	4	2	1	1	1	3	2	3	3	2
	Number of promotional materials developed	copies	300	500	300	500	350	550	500	500	0.001	130	1000	50	0.001	0.001	0.001	0.001	0.001	1000	0.001	0.001	1000	600	700	300	700	200	500	50	0.001	2000	500	10000	500	600	15000	1000	1000	500	620	100	100	100	1000	200	500	500	500
	Disaster early-warning display screen	1or0,whether or not	0.001	0.001	0.001	0.001	0.001	0.001	0.001	0.001	0.001	0.001	1	1	1	1	1	1	1	1	0.001	0.001	1	1	0.001	0.001	0.001	1	0.001	0	1	0.001	0.001	0.001	1	1	1	1	1	1	1	1	0.001	0.001	1	1	1	1	1
	Publicizing official account of disaster reduction	1or0,whether or not	0.001	0.001	0.001	0.001	0.001	0.001	0.001	0.001	0.001	0.001	0.001	1	1	1	1	1	1	1	0.001	0.001	1	0.001	0.001	0.001	0.001	0.001	0.001	0	0.001	0.001	0.001	1	0.001	0.001	1	1	0.001	0.001	0.001	0.001	0.001	0.001	1	1	1	1	1
	Frequency of emergency practice	times/year	2	1	2	2	2	2	2	2	0.001	2	2	2	1	1	1	1	1	2	0.001	1	2	2	2	0.001	1	2	1	1	1	4	1	2	2	2	4	1	2	1	2	0.001	0.001	0.001	1	1	1	1	1
[truncated: 27 more columns]

## Sheet: Grey target transformation
			Dongzhu Twn											Fengqiao Str							Hengtang Str		Xushuguan Twn											Shishan Str								Tongan Twn
Primary Indices	Secondary Indices	Unit	Ljing 1st	Ljing 2nd	Xxu	Yma	Dshi	Yjiang	Yshi	Zhcun	Xsu	Hqu	Chxiang	Dbang	Fjin	Kjia	Mbang	Ma 1st	Ma 2nd	Xjinqiao	Shihu	Xfu	Yxin	Ylian	Wgong	Xshan	Qdeng	Lhua	Jtu	Jting	Hfeng	Hxiang	Bwei	Hshan	Jse	Shshan	Wfen	Xsheng	Xtai	Hshan	Xshi	Byao	Djing	Hchuan	Htong 1st	Htong 2nd	Htong 3rd	Htong 4th	Htong 6th
Disaster risk evaluation capability	Number of group event disasters	times/year	1	0.001	0.001	0.001	0.001	0.001	0.001	0.001	0.001	0.001	0.001	0.001	0.001	0.001	0.001	0.001	0.001	0.001	0.001	0.001	0.001	0.001	0.001	1	3	0.001	0.001	0.001	0.001	0.001	0.001	0.001	0.001	0.001	0.001	0.001	0.001	0.001	1	0.001	0.001	0.001	0.001	0.001	0.001	0.001	0.001
			0.001	1	1	1	1	1	1	1	1	1	1	1	1	1	1	1	1	1	1	1	1	1	1	0.001	0.000333333	1	1	1	1	1	1	1	1	1	1	1	1	1	0.001	1	1	1	1	1	1	1	1
	Number of fire disasters	times/year	0.001	0.001	0.001	0.001	0.001	0.001	0.001	0.001	0.001	0.001	0.001	0.001	1	0.001	1	0.001	0.001	2	0.001	1	0.001	0.001	0.001	0.001	0.001	1	0.001	2	0.001	1	0.001	0.001	0.001	5	0.001	0.001	6	2	0.001	0.001	0.001	0.001	0.001	0.001	0.001	0.001	0.001
			1	1	1	1	1	1	1	1	1	1	1	1	0.001	1	0.001	1	1	0.0005	1	0.001	1	1	1	1	1	0.001	1	0.0005	1	0.001	1	1	1	0.0002	1	1	0.000166667	0.0005	1	1	1	1	1	1	1	1	1
	Disaster risk	1-4, from weak to strong	1	1	1	1	1	1	1	1	1	1	1	1	1	1	2	1	1	2	1	1	3	1	1	3	3	1	2	1	2	2	1	2	1	2	1	2	1	3	1	2	2	2	2	2	2	3	3
			1	1	1	1	1	1	1	1	1	1	1	1	1	1	0.5	1	1	0.5	1	1	0.333333	1	1	0.333333	0.333333	1	0.5	1	0.5	0.5	1	0.5	1	0.5	1	0.5	1	0.333333	1	0.5	0.5	0.5	0.5	0.5	0.5	0.333333	0.333333
Rescue and support capability	Compilation of comprehensive asylum map	Compilation of comprehensive asylum map	1	1	1	1	1	0.001	0.001	1	1	1	1	0.001	0.001	0.001	0.001	0.001	0.001	0.001	0.001	0.001	1	1	0.001	1	1	1	1	1	0.001	1	0.001	1	1	1	1	1	1	1	1	0.001	0.001	0.001	0.001	0.001	0.001	0.001	0.001
			1	1	1	1	1	0.001	0.001	1	1	1	1	0.001	0.001	0.001	0.001	0.001	0.001	0.001	0.001	0.001	1	1	0.001	1	1	1	1	1	0.001	1	0.001	1	1	1	1	1	1	1	1	0.001	0.001	0.001	0.001	0.001	0.001	0.001	0.001
	Disaster reduction capital investment	10000RMB/year	2	1	1	1	1	1	1	1	0.001	1	1	3	3	3	3	3	3	3	0.001	0.001	20	20	0.001	2	2	0.001	2	0.001	0.001	20	0.2	1.5	2	15	5	3	26.195	0.2	1	0.001	0.001	0.001	0.001	0.001	0.001	0.001	0.001
			0.0666667	0.0333333	0.0333333	0.0333333	0.0333333	0.0333333	0.0333333	0.0333333	3.33333e-05	0.0333333	0.0333333	0.1	0.1	0.1	0.1	0.1	0.1	0.1	3.33333e-05	3.33333e-05	0.666667	0.666667	3.33333e-05	0.0666667	0.0666667	3.33333e-05	0.0666667	3.33333e-05	3.33333e-05	0.666667	0.00666667	0.05	0.0666667	0.5	0.166667	0.1	0.873167	0.00666667	0.0333333	3.33333e-05	3.33333e-05	3.33333e-05	3.33333e-05	3.33333e-05	3.33333e-05	3.33333e-05	3.33333e-05
	Number of emergency rescue teams	teams	1	1	1	1	1	1	1	1	1	1	1	1	1	1	1	1	1	2	0.001	1	7	7	1	2	1	2	1	1	1	4	1	7	5	8	7	4	4	1	6	1	1	1	1	1	1	6	4
			0.0769231	0.0769231	0.0769231	0.0769231	0.0769231	0.0769231	0.0769231	0.0769231	0.0769231	0.0769231	0.0769231	0.0769231	0.0769231	0.0769231	0.0769231	0.0769231	0.0769231	0.153846	7.69231e-05	0.0769231	0.538462	0.538462	0.0769231	0.153846	0.0769231	0.153846	0.0769231	0.0769231	0.0769231	0.307692	0.0769231	0.538462	0.384615	0.615385	0.538462	0.307692	0.307692	0.0769231	0.461538	0.0769231	0.0769231	0.0769231	0.0769231	0.0769231	0.0769231	0.461538	0.307692
	Disaster information personnel	persons	1	18	1	2	1	1	1	2	2	2	2	1	1	1	1	1	1	1	0.001	0.001	1	68	1	1	5	1	3	1	1	1	1	1	1	1	1	1	5	1	1	1	1	1	1	1	1	1	1
			0.0147059	0.264706	0.0147059	0.0294118	0.0147059	0.0147059	0.0147059	0.0294118	0.0294118	0.0294118	0.0294118	0.0147059	0.0147059	0.0147059	0.0147059	0.0147059	0.0147059	0.0147059	1.47059e-05	1.47059e-05	0.0147059	1	0.0147059	0.0147059	0.0735294	0.0147059	0.0441176	0.0147059	0.0147059	0.0147059	0.0147059	0.0147059	0.0147059	0.0147059	0.0147059	0.0147059	0.0735294	0.0147059	0.0147059	0.0147059	0.0147059	0.0147059	0.0147059	0.0147059	0.0147059	0.0147059	0.0147059
	Reserve of rescue materials	10000RMB	0.001	0.001	0.5	0.5	0.5	0.8	0.5	0.5	0.001	0.5	0.5	1	1	1	1	1	1	1	0.001	0.001	1	2	0.5	5	1	0.3	1	5	0.001	2	1	1	1.5	3	2.3	1	2	1.5	3	1	1	1	0.001	0.001	0.001	2	2
			5e-05	5e-05	0.025	0.025	0.025	0.04	0.025	0.025	5e-05	0.025	0.025	0.05	0.05	0.05	0.05	0.05	0.05	0.05	5e-05	5e-05	0.05	0.1	0.025	0.25	0.05	0.015	0.05	0.25	5e-05	0.1	0.05	0.05	0.075	0.15	0.115	0.05	0.1	0.075	0.15	0.05	0.05	0.05	5e-05	5e-05	5e-05	0.1	0.1
	Per capita medical resources	/10,000 persons	2	0.001	38.91	135	38.91	13.5	0.001	136.4	0.001	116.3	51	7.77	0.001	14.88	5	12.63	12.63	12.63	0.001		17.98	15.28	22.22	17.54	34.55	4.1	38.58	17.54	7.58	17.54	17.54	0.42	0.001	0.001	171.31	171.31	10	0.87	2.35	0.001	0.001	5.25	163.64	91.81	5.88	67.42	130.43
			0.0116747	5.83737e-06	0.227132	0.788045	0.227132	0.0788045	5.83737e-06	0.796217	5.83737e-06	0.678886	0.297706	0.0453564	5.83737e-06	0.0868601	0.0291869	0.073726	0.073726	0.073726	5.83737e-06	1	0.104956	0.089195	0.129706	0.102387	0.201681	0.0239332	0.225206	0.102387	0.0442473	0.102387	0.102387	0.0024517	5.83737e-06	5.83737e-06	1	1	0.0583737	0.00507851	0.0137178	5.83737e-06	5.83737e-06	0.0306462	0.955227	0.535929	0.0343237	0.393556	0.761368
Engineering defense capability	Ratio of non-construction area	%	80	83	86	94	95	94	91	91	93	93	92	69	66	71	68	87	87	72	80	89.5	92	83	95	83	89	63	94	94	75	68	83	72	74	69	75	86	74	72	75	94	94	92	78	73	85	87	83
			0.842105	0.873684	0.905263	0.989474	1	0.989474	0.957895	0.957895	0.978947	0.978947	0.968421	0.726316	0.694737	0.747368	0.715789	0.915789	0.915789	0.757895	0.842105	0.942105	0.968421	0.873684	1	0.873684	0.936842	0.663158	0.989474	0.989474	0.789474	0.715789	0.873684	0.757895	0.778947	0.726316	0.789474	0.905263	0.778947	0.757895	0.789474	0.989474	0.989474	0.968421	0.821053	0.768421	0.894737	0.915789	0.873684
	Internal road density	km/km2	9.1	7.2	8.4	2.6	1.8	2	3.9	4	1.8	2	2.9	12.2	15.3	7.2	15	4.2	4.2	11.2	8.8	7.2	5	4.9	1.3	4.7	3.8	4.7	2.4	1.9	10.6	4.9	7.9	5.7	7.3	9.2	6.5	7.3	9.1	11.2	6.9	3.8	2.3	4.4	7.1	12	8.5	6.3	11.46
			0.594771	0.470588	0.54902	0.169935	0.117647	0.130719	0.254902	0.261438	0.117647	0.130719	0.189542	0.797386	1	0.470588	0.980392	0.27451	0.27451	0.732026	0.575163	0.470588	0.326797	0.320261	0.0849673	0.30719	0.248366	0.30719	0.156863	0.124183	0.69281	0.320261	0.51634	0.372549	0.477124	0.601307	0.424837	0.477124	0.594771	0.732026	0.45098	0.248366	0.150327	0.287582	0.464052	0.784314	0.555556	0.411765	0.74902
	Standard proportion of building fortifications	%	98.727	98.8076	94.3471	99.8806	98.8056	97.0092	99.2792	98.4	99.3178	99.6925	97.2552	95.0694	96.6137	98.0444	97.2924	97.7	97.2	97.1732	97.1317	94.1	97.566	97.5435	99.5271	97.3297	98.4286	98.1522	99.5806	97.5	96.1696	97.453	96.7591	97.0289	95.3303	96.3622	97.3988	96.4639	97.0257	95.2011	96.6688	97.431	97.7782	97.9677	93.5988	98.2293	99.9156	96.4158	93.9
			0.98806	0.988867	0.944226	0.999606	0.988847	0.970869	0.993586	0.984788	0.993973	0.997723	0.973331	0.951455	0.966911	0.981229	0.973703	0.977782	0.972778	0.97251	0.972094	0.941753	0.976441	0.976216	0.996067	0.974076	0.985074	0.982308	0.996604	0.975781	0.962466	0.97531	0.968365	0.971066	0.954066	0.964394	0.974768	0.965411	0.971034	0.952774	0.967462	0.97509	0.978565	0.980462	0.936737	0.98308	0.999956	0.96493	0.939752
	Completion rate of fire protection facilities	0-1	1	1	1	1	1	1	1	1	0.001	1	1	1	1	0.01	1	1	1	1	0.001	0.8	1	1	0.001	1	1	1	1	0.99	1	1	1	0.001	0.001	1	0.97	1	0.001	0.88	0.001	0.001	0.001	0.001	0.001	0.001	0.001	0.001	0.001
			1	1	1	1	1	1	1	1	0.001	1	1	1	1	0.01	1	1	1	1	0.001	0.8	1	1	0.001	1	1	1	1	0.99	1	1	1	0.001	0.001	1	0.97	1	0.001	0.88	0.001	0.001	0.001	0.001	0.001	0.001	0.001	0.001	0.001
	Area of underground civil defense facilities	square meters	0.001	0.001	0.001	0.001	0.001	0.001	0.001	0.001	0.001	0.001	0.001	12907.3	1000	1500	8000	57713.5	2000	15898.9		7800	0.001	0.001	0.001	0.001	0.001	15000	0.001	53565	7741	0.001	0.001	0.001	0.001	0.001	18804.1	65000	0.001	15991	0.001	0.001	0.001	0.001	0.001	0.001	0.001	0.001	0.001
			1.53846e-08	1.53846e-08	1.53846e-08	1.53846e-08	1.53846e-08	1.53846e-08	1.53846e-08	1.53846e-08	1.53846e-08	1.53846e-08	1.53846e-08	0.198574	0.0153846	0.0230769	0.123077	0.8879	0.0307692	0.244599	1	0.12	1.53846e-08	1.53846e-08	1.53846e-08	1.53846e-08	1.53846e-08	0.230769	1.53846e-08	0.824077	0.119092	1.53846e-08	1.53846e-08	1.53846e-08	1.53846e-08	1.53846e-08	0.289294	1	1.53846e-08	0.246015	1.53846e-08	1.53846e-08	1.53846e-08	1.53846e-08	1.53846e-08	1.53846e-08	1.53846e-08	1.53846e-08	1.53846e-08
Social and	Ratio of population from 18-60 years old	﹪	67	67	58	31	60	68	69	61	70	60	58	85	51	80	48	0.58	0.6	0.19	12	60	0.63	90	60	0.79	61	90	61	0.67	55	50	0.61	47	52	87	57	63	65	53	63	65	56	53	33	57	45	37	48
			0.744444	0.744444	0.644444	0.344444	0.666667	0.755556	0.766667	0.677778	0.777778	0.666667	0.644444	0.944444	0.566667	0.888889	0.533333	0.00644444	0.00666667	0.00211111	0.133333	0.666667	0.007	1	0.666667	0.00877778	0.677778	1	0.677778	0.00744444	0.611111	0.555556	0.00677778	0.522222	0.577778	0.966667	0.633333	0.7	0.722222	0.588889	0.7	0.722222	0.622222	0.588889	0.366667	0.633333	0.5	0.411111	0.533333
	Income per capita	10000RMB	1.45	1.45	1.25	2	1.25	2.5	2.5	1.2	1.45	3.12	2.05	3	3	3	3	3	3	4	1.5	1.5	0.47	1.6	2.1	1	2.2	1.6	2.2	4.1	1.6	1.6	0.5	5	5	5	5.6	5	5	5	5	1.8	1.5	1.8	1.5	1.5	1.5	1.5
			0.258929	0.258929	0.223214	0.357143	0.223214	0.446429	0.446429	0.214286	0.258929	0.557143	0.366071	0.535714	0.535714	0.535714	0.535714	0.535714	0.535714	0.714286	0.267857	0.267857	0.0839286	0.285714	0.375	0.178571	0.392857	0.285714	0.392857	0.732143	0.285714	0.285714	0.0892857	0.892857	0.892857	0.892857	1	0.892857	0.892857	0.892857	0.892857	0.321429	0.267857	0.321429	0.267857	0.267857	0.267857	0.267857	1
Disaster management capability	Daily management system	1or0,whether or not	1	1	1	1	1	1	1	1	1	1	1	1	1	1	1	1	1	1	0.001	1	1	1	1	1	1	0.001	1	1	0.001	1	1	1	1	1	1	1	1	1	1	1	1	1	1	1	1	1	1
			1	1	1	1	1	1	1	1	1	1	1	1	1	1	1	1	1	1	0.001	1	1	1	1	1	1	0.001	1	1	0.001	1	1	1	1	1	1	1	1	1	1	1	1	1	1	1	1	1	1
	Periodic inspection system	1or0,whether or not	1	1	1	1	1	1	1	1	1	1	1	1	1	1	1	1	1	1	0.001	1	1	1	1	1	1	1	1	1	0.001	1	1	1	1	1	1	1	1	1	1	1	1	1	1	1	1	1	1
			1	1	1	1	1	1	1	1	1	1	1	1	1	1	1	1	1	1	0.001	1	1	1	1	1	1	1	1	1	0.001	1	1	1	1	1	1	1	1	1	1	1	1	1	1	1	1	1	1
	Periodic examination system	1or0,whether or not	0.001	1	1	1	1	1	1	1	1	1	1	1	1	1	1	1	1	1	0.001	1	1	1	1	1	1	1	1	1	0.001	1	1	1	1	1	1	1	1	1	1	1	1	1	1	1	1	1	1
			0.001	1	1	1	1	1	1	1	1	1	1	1	1	1	1	1	1	1	0.001	1	1	1	1	1	1	1	1	1	0.001	1	1	1	1	1	1	1	1	1	1	1	1	1	1	1	1	1	1
	Social mobilization mechanism	1or0,whether or not	0.001	1	1	1	1	1	1	1	1	1	1	1	1	1	1	1	1	1	0.001	1	1	1	1	1	1	1	1	1	0.001	1	1	1	1	1	1	1	1	1	1	1	1	1	1	1	1	1	1
			0.001	1	1	1	1	1	1	1	1	1	1	1	1	1	1	1	1	1	0.001	1	1	1	1	1	1	1	1	1	0.001	1	1	1	1	1	1	1	1	1	1	1	1	1	1	1	1	1	1
	Comprehensive disaster reduction archive	1or0,whether or not	1	1	1	1	1	1	1	1	1	1	1	0.001	0.001	0.001	0.001	0.001	0.001	0.001	0.001	1	1	1	1	1	1	1	1	1	0.001	1	1	1	1	1	1	1	1	1	1	1	1	1	1	1	1	1	1
			1	1	1	1	1	1	1	1	1	1	1	0.001	0.001	0.001	0.001	0.001	0.001	0.001	0.001	1	1	1	1	1	1	1	1	1	0.001	1	1	1	1	1	1	1	1	1	1	1	1	1	1	1	1	1	1
	Comprehensive disaster reduction demonstration	1or0,whether or not	0.001	0.001	0.001	0.001	0.001	0.001	0.001	0.001	0.001	0.001	0.001	0.001	1	0.001	0.001	0.001	0.001	0.001	0.001	0.001	0.001	1	0.001	0.001	0.001	0.001	0.001	0.001	0.001	1	0.001	0.001	0.001	1	1	1	1	0.001	0.001	0.001	0.001	0.001	0.001	0.001	0.001	0.001	0.001
			0.001	0.001	0.001	0.001	0.001	0.001	0.001	0.001	0.001	0.001	0.001	0.001	1	0.001	0.001	0.001	0.001	0.001	0.001	0.001	0.001	1	0.001	0.001	0.001	0.001	0.001	0.001	0.001	1	0.001	0.001	0.001	1	1	1	1	0.001	0.001	0.001	0.001	0.001	0.001	0.001	0.001	0.001	0.001
	Quality of demonstration community archive	0,1,2,respectively poor,good and better	1	1	1	1	1	1	1	1	1	1	1	0.001	1	1	0.001	0.001	0.001	0.001	2	1	1	2	0.001	0.001	0.001	1	1	0	0.001	2	0.001	1	2	2	2	2	2	0.001	2	1	1	1	1	1	1	1	1
			0.5	0.5	0.5	0.5	0.5	0.5	0.5	0.5	0.5	0.5	0.5	0.0005	0.5	0.5	0.0005	0.0005	0.0005	0.0005	1	0.5	0.5	1	0.0005	0.0005	0.0005	0.5	0.5	0	0.0005	1	0.0005	0.5	1	1	1	1	1	0.0005	1	0.5	0.5	0.5	0.5	0.5	0.5	0.5	0.5
	Proportion of volunteers	%	0.3	0.014	0.01	0.13	0.1	0.75	6	0.2	5	0.2	14	2.43	1	1	1.6	3	1.5	2.8	0.001	3.3	1.7	1.5	1	7.9	1.3	1	2	2	0.85	1.35	0.35	2.7	6.48	1.34	2.6	2.8	3	3	1.1	0.00625	0.00518	0.00525	0.38	0.612	0.3	0.449	0.87
			0.015	0.0007	0.0005	0.0065	0.005	0.0375	0.3	0.01	0.25	0.01	0.7	0.1215	0.05	0.05	0.08	0.15	0.075	0.14	5e-05	0.165	0.085	0.075	0.05	0.395	0.065	0.05	0.1	0.1	0.0425	0.0675	0.0175	0.135	0.324	0.067	0.13	0.14	0.15	0.15	0.055	0.0003125	0.000259	0.0002625	0.019	0.0306	0.015	0.02245	0.0435
Public cognitive capability	Frequency of disaster reduction publicity activity	times/year	2	1	1	1	1	2	2	1	0.001	1	1	5	2	4	2	4	4	3	0.001	1	5	8	2	80	2	2	2	1	1	4	500	5	4	2	4	2	2	2	12	1	1	1	1	1	3	2	2
			0.004	0.002	0.002	0.002	0.002	0.004	0.004	0.002	2e-06	0.002	0.002	0.01	0.004	0.008	0.004	0.008	0.008	0.006	2e-06	0.002	0.01	0.016	0.004	0.16	0.004	0.004	0.004	0.002	0.002	0.008	1	0.01	0.008	0.004	0.008	0.004	0.004	0.004	0.024	0.002	0.002	0.002	0.002	0.002	0.006	0.004	0.004
	Number of promotional columns		1	1	1	1	1	2	2	1	0.001	1	1	2	1	1	1	1	1	2	1	0.001	16	11	1	2	1	1	1	1	0.001	8	1	14	1	5	12	1	12	4	2	1	1	1	3	2	3	3	2
			0.0625	0.0625	0.0625	0.0625	0.0625	0.125	0.125	0.0625	6.25e-05	0.0625	0.0625	0.125	0.0625	0.0625	0.0625	0.0625	0.0625	0.125	0.0625	6.25e-05	1	0.6875	0.0625	0.125	0.0625	0.0625	0.0625	0.0625	6.25e-05	0.5	0.0625	0.875	0.0625	0.3125	0.75	0.0625	0.75	0.25	0.125	0.0625	0.0625	0.0625	0.1875	0.125	0.1875	0.1875	0.125
	Number of promotional materials developed	copies	300	500	300	500	350	550	500	500	0.001	130	1000	50	0.001	0.001	0.001	0.001	0.001	1000	0.001	0.001	1000	600	700	300	700	200	500	50	0.001	2000	500	10000	500	600	15000	1000	1000	500	620	100	100	100	1000	200	500	500	500
			0.02	0.0333333	0.02	0.0333333	0.0233333	0.0366667	0.0333333	0.0333333	6.66667e-08	0.00866667	0.0666667	0.00333333	6.66667e-08	6.66667e-08	6.66667e-08	6.66667e-08	6.66667e-08	0.0666667	6.66667e-08	6.66667e-08	0.0666667	0.04	0.0466667	0.02	0.0466667	0.0133333	0.0333333	0.00333333	6.66667e-08	0.133333	0.0333333	0.666667	0.0333333	0.04	1	0.0666667	0.0666667	0.0333333	0.0413333	0.00666667	0.00666667	0.00666667	0.0666667	0.0133333	0.0333333	0.0333333	0.0333333
	Disaster early-warning display screen	1or0,whether or not	0.001	0.001	0.001	0.001	0.001	0.001	0.001	0.001	0.001	0.001	1	1	1	1	1	1	1	1	0.001	0.001	1	1	0.001	0.001	0.001	1	0.001	0	1	0.001	0.001	0.001	1	1	1	1	1	1	1	1	0.001	0.001	1	1	1	1	1
			0.001	0.001	0.001	0.001	0.001	0.001	0.001	0.001	0.001	0.001	1	1	1	1	1	1	1	1	0.001	0.001	1	1	0.001	0.001	0.001	1	0.001	0	1	0.001	0.001	0.001	1	1	1	1	1	1	1	1	0.001	0.001	1	1	1	1	1
	Publicizing official account of disaster reduction	1or0,whether or not	0.001	0.001	0.001	0.001	0.001	0.001	0.001	0.001	0.001	0.001	0.001	1	1	1	1	1	1	1	0.001	0.001	1	0.001	0.001	0.001	0.001	0.001	0.001	0	0.001	0.001	0.001	1	0.001	0.001	1	1	0.001	0.001	0.001	0.001	0.001	0.001	1	1	1	1	1
			0.001	0.001	0.001	0.001	0.001	0.001	0.001	0.001	0.001	0.001	0.001	1	1	1	1	1	1	1	0.001	0.001	1	0.001	0.001	0.001	0.001	0.001	0.001	0	0.001	0.001	0.001	1	0.001	0.001	1	1	0.001	0.001	0.001	0.001	0.001	0.001	1	1	1	1	1
	Frequency of emergency practice	times/year	2	1	2	2	2	2	2	2	0.001	2	2	2	1	1	1	1	1	2	0.001	1	2	2	2	0.001	1	2	1	1	1	4	1	2	2	2	4	1	2	1	2	0.001	0.001	0.001	1	1	1	1	1
			0.5	0.25	0.5	0.5	0.5	0.5	0.5	0.5	0.00025	0.5	0.5	0.5	0.25	0.25	0.25	0.25	0.25	0.5	0.00025	0.25	0.5	0.5	0.5	0.00025	0.25	0.5	0.25	0.25	0.25	1	0.25	0.5	0.5	0.5	1	0.25	0.5	0.25	0.5	0.00025	0.00025	0.00025	0.25	0.25	0.25	0.25	0.25
[truncated: 26 more columns]

[truncated: 8 more sheets: Grey correlation differration , Target center coefficien, Entropy weight, Target center degree(TCD), TCD of primary index, Entroy weight results, TCD of primary index(Entroy), Potential analysis]
